# Supplementary material for: Vaccine-Induced T-Cell and Antibody Responses at 12 Months after Full Vaccination Differ with Respect to Omicron Recognition
Source: MDPI journal article supplement (doi:10.3390/vaccines10091563), 2022-09-19
Supplement: s1 [file s1]

## Supplementary materials

### Vaccine-induced T- and B-cell responses differ with respect to Omicron recognition

Franz Mai <sup>1</sup>, Johann Volzke <sup>1</sup>, Emil C. Reisinger <sup>2</sup> and Brigitte Müller-Hilke <sup>1,\*</sup>

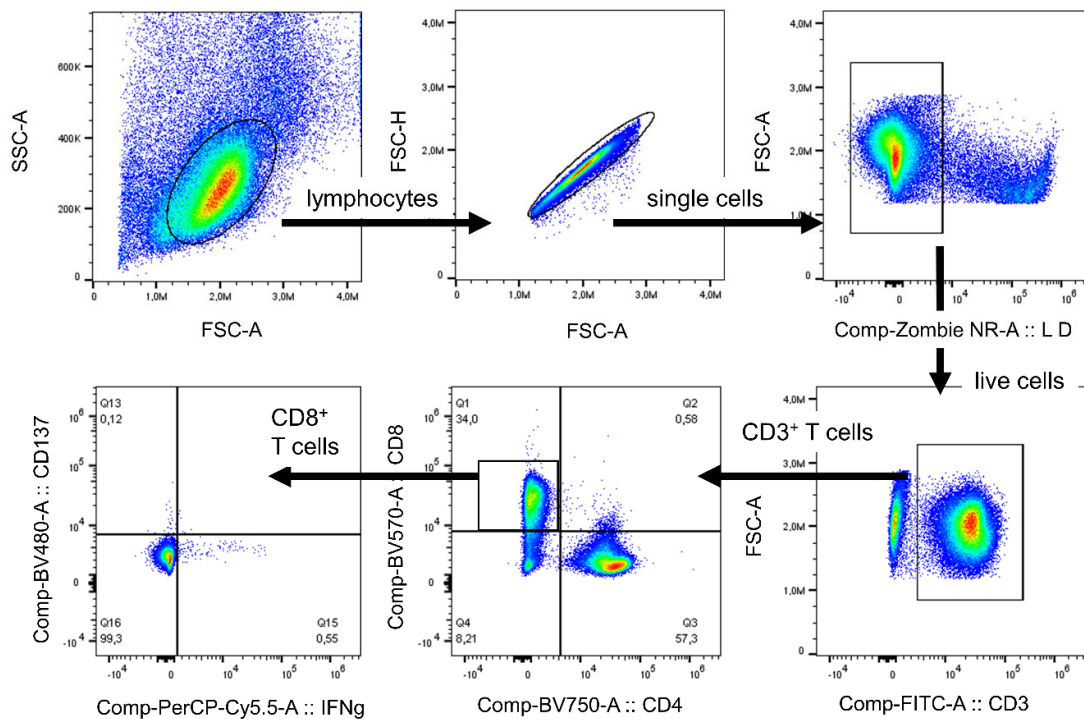

**Figure S1.** Gating scheme for analyzing T cell responses following BNT162b2 re-stimulation. Arrows indicate hierarchical gating steps.

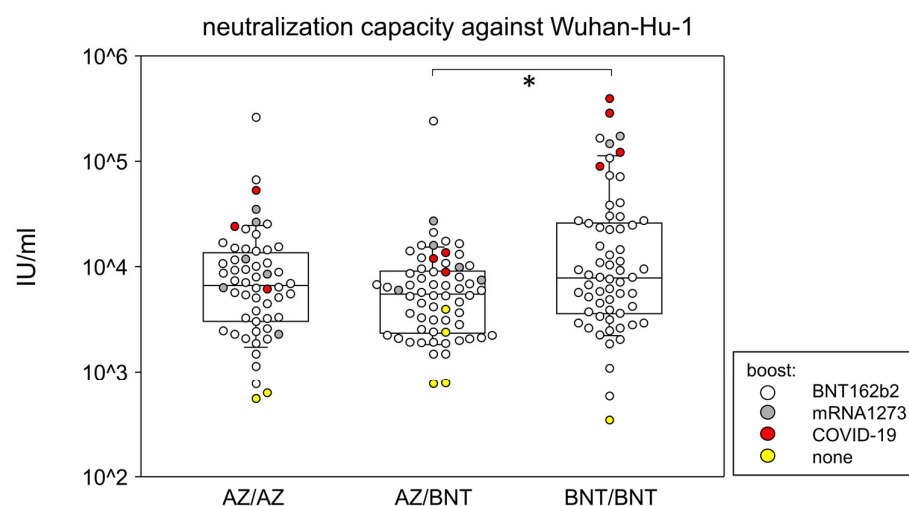

**Figure S2. Primary / secondary immunization with BNT162b2 and hybrid immunity led to maximum neutralization capacities against the Wuhan-Hu-1 spike protein.** Dot plots and corresponding box plots show neutralization capacities against the Wu-Hu-1 spike protein presented in IU/ml. AZ/AZ: homologous primary/secondary immunization with AZD1222, AZ/BNT: heterologous primary/secondary immunization with AZD1222 and BNT162b2, BNT/BNT: homologous primary/secondary immunization with BNT162b2. Color codes indicate boost variants. Kruskal-Wallis test followed by Dunn's multiple comparison test resulted in a p value of 0.0180, asterisk indicates statistically significant differences.

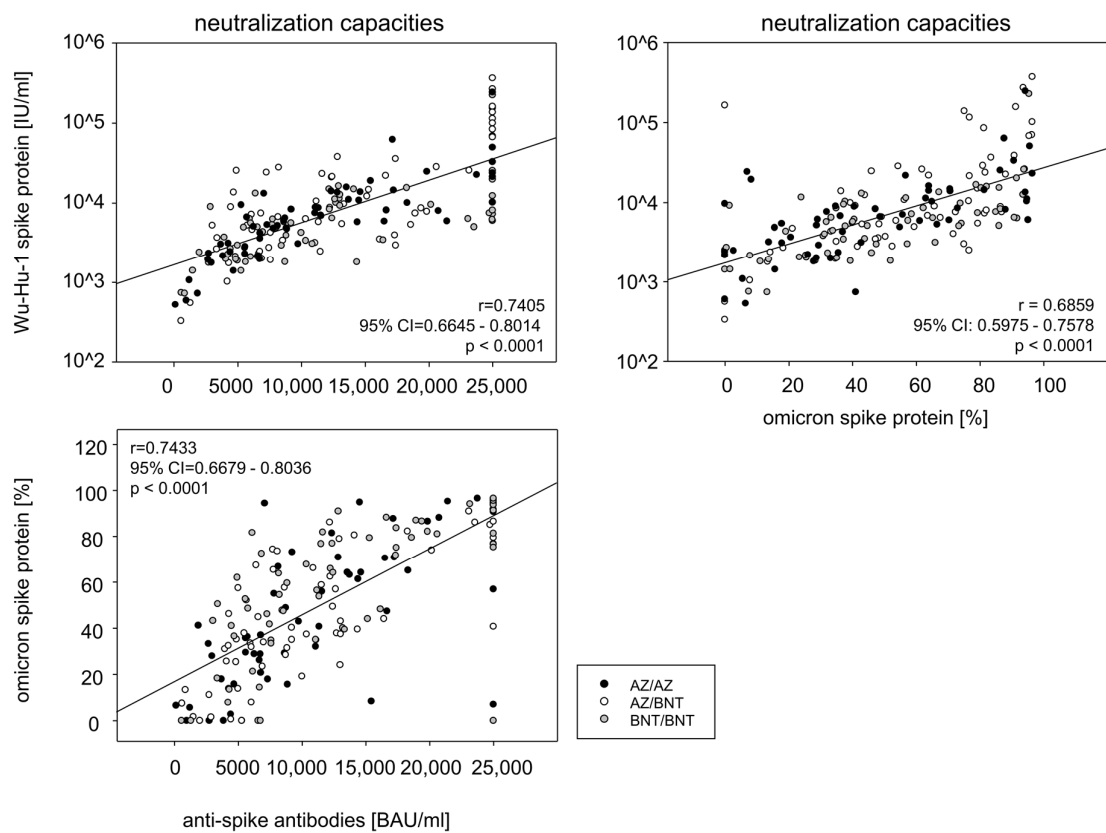

**Figure S3. Correlation between antibody concentration and neutralization capacities.** Dot blots show the correlation between anti-spike antibody concentrations (BAU/ml) and their neutralization capacities against the wild type (Wu-Hu-1) spike protein (upper left panel) and its Omicron variant (lower left panel) and the correlation between neutralization capacities against Wu-Hu-1 and Omicron (upper right panel). Correlation coefficients ( $r$ ), 95% confidence intervals (CI) and  $p$  values result from Spearman rank correlation analyses. The color scheme indicates vaccination regimen.

**Table S1.** T cell response to *in vitro* re-stimulation with BNT162b2

| Probe | BAU/ml | IU/ml | CD4 <sup>+</sup> T helper cells (n/10 <sup>6</sup> live PBMC) |                   |                           |                           |                   |                    | CD8 <sup>+</sup> cytotoxic T cells (n/10 <sup>6</sup> live PBMC) |                   |                           |                           |                   |                    |
|-------|--------|-------|---------------------------------------------------------------|-------------------|---------------------------|---------------------------|-------------------|--------------------|------------------------------------------------------------------|-------------------|---------------------------|---------------------------|-------------------|--------------------|
|       |        |       | CD137 <sup>+</sup>                                            | IL-2 <sup>+</sup> | IFN $\gamma$ <sup>+</sup> | TNF $\alpha$ <sup>+</sup> | IL-4 <sup>+</sup> | IL-10 <sup>+</sup> | CD137 <sup>+</sup>                                               | IL-2 <sup>+</sup> | IFN $\gamma$ <sup>+</sup> | TNF $\alpha$ <sup>+</sup> | IL-4 <sup>+</sup> | IL-10 <sup>+</sup> |
| A03   | 1870   | 734   | 381                                                           | 488               | 548                       | 71                        | 1202              | 381                | 488                                                              | 1381              | 2060                      | 381                       | 464               | 405                |
| A07   | 6729   | 2002  | 557                                                           | 1437              | 356                       | 223                       | 323               | 189                | 490                                                              | 646               | 1158                      | 290                       | 345               | 234                |
| A09   | 6649   | 2196  | 325                                                           | 560               | 347                       | 168                       | 336               | 403                | 358                                                              | 493               | 437                       | 157                       | 90                | 604                |
| A17   | 12344  | 14458 | 249                                                           | 554               | 158                       | 170                       | 238               | 34                 | 238                                                              | 724               | 1063                      | 769                       | 215               | 68                 |
| A20   | 13719  | 11362 | 603                                                           | 1346              | 81                        | 46                        | 313               | 858                | 464                                                              | 870               | 522                       | 429                       | 452               | 487                |
| A21   | 6766   | 3653  | 266                                                           | 578               | 393                       | 243                       | 705               | 312                | 497                                                              | 1086              | 566                       | 439                       | 243               | 578                |
| A23   | 16664  | 8326  | 848                                                           | 218               | 344                       | 103                       | 115               | 401                | 527                                                              | 241               | 860                       | 252                       | 149               | 447                |
| A24   | 13547  | 16199 | 247                                                           | 82                | 141                       | 141                       | 634               | 258                | 646                                                              | 164               | 693                       | 423                       | 493               | 399                |
| A25   | 11101  | 9069  | 343                                                           | 1803              | 245                       | 98                        | 417               | 601                | 527                                                              | 1337              | 1288                      | 343                       | 196               | 552                |
| A45   | 2672   | 1982  | 591                                                           | 230               | 591                       | 115                       | 230               | 1673               | 1214                                                             | 2789              | 1034                      | 574                       | 164               | 771                |
| AB05  | 12916  | 16762 | 635                                                           | 1019              | 192                       | 372                       | 240               | 456                | 971                                                              | 468               | 1391                      | 360                       | 432               | 492                |
| AB06  | 13033  | 9529  | 718                                                           | 581               | 251                       | 171                       | 274               | 388                | 980                                                              | 570               | 718                       | 137                       | 114               | 376                |
| AB14  | 4860   | 1989  | 341                                                           | 1139              | 223                       | 352                       | 317               | 1843               | 282                                                              | 1033              | 505                       | 481                       | 223               | 1949               |
| AB16  | 24974  | 6379  | 868                                                           | 1505              | 339                       | 54                        | 285               | 95                 | 596                                                              | 664               | 2006                      | 529                       | 230               | 366                |
| AB18  | 12704  | 10382 | 733                                                           | 577               | 666                       | 78                        | 533               | 766                | 555                                                              | 355               | 1199                      | 477                       | 56                | 522                |
| AB20  | 10350  | 3449  | 498                                                           | 815               | 1222                      | 106                       | 709               | 785                | 1494                                                             | 1283              | 5387                      | 2807                      | 2007              | 1343               |

|          |       |        |      |      |      |     |     |      |      |      |      |     |      |      |
|----------|-------|--------|------|------|------|-----|-----|------|------|------|------|-----|------|------|
| AB21     | 6891  | 2037   | 382  | 111  | 731  | 64  | 366 | 334  | 906  | 700  | 1097 | 572 | 207  | 811  |
| AB36_COV | 6390  | 13550  | 525  | 110  | 171  | 147 | 342 | 489  | 794  | 440  | 1417 | 171 | 195  | 525  |
| AB50     | 10863 | 3141   | 694  | 0    | 256  | 97  | 475 | 450  | 1351 | 402  | 1764 | 110 | 986  | 377  |
| AB51     | 8060  | 5093   | 474  | 71   | 391  | 296 | 273 | 427  | 569  | 498  | 948  | 569 | 225  | 427  |
| AB53     | 13020 | 13070  | 289  | 185  | 369  | 173 | 600 | 808  | 635  | 162  | 658  | 173 | 150  | 381  |
| AB54_COV | 2873  | 9171   | 257  | 315  | 432  | 128 | 350 | 595  | 665  | 257  | 1109 | 432 | 607  | 502  |
| B24      | 6668  | 2378   | 725  | 456  | 362  | 188 | 268 | 443  | 416  | 523  | 456  | 174 | 456  | 376  |
| B25      | 17397 | 3020   | 423  | 833  | 579  | 85  | 97  | 785  | 483  | 857  | 1050 | 664 | 97   | 736  |
| B35_COV  | 25000 | 117376 | 457  | 169  | 265  | 72  | 361 | 445  | 313  | 337  | 1420 | 301 | 241  | 481  |
| B41      | 7579  | 1954   | 164  | 197  | 181  | 82  | 756 | 986  | 2021 | 592  | 2432 | 312 | 181  | 1068 |
| B44      | 25000 | 103092 | 776  | 418  | 1239 | 90  | 448 | 2538 | 941  | 418  | 836  | 299 | 254  | 747  |
| B47      | 6750  | 2515   | 589  | 360  | 589  | 147 | 671 | 1260 | 1391 | 376  | 1521 | 703 | 147  | 753  |
| B54      | 8227  | 28754  | 265  | 1236 | 177  | 99  | 254 | 177  | 530  | 839  | 1435 | 143 | 320  | 342  |
| B55      | 6562  | 2161   | 458  | 153  | 305  | 127 | 662 | 598  | 1387 | 1450 | 2392 | 305 | 1120 | 382  |
| B56      | 11493 | 2506   | 139  | 506  | 367  | 127 | 203 | 342  | 1140 | 810  | 1405 | 329 | 696  | 532  |
| B57      | 3353  | 2693   | 1117 | 444  | 279  | 114 | 355 | 673  | 178  | 685  | 584  | 114 | 216  | 203  |
| B58      | 4194  | 1042   | 757  | 244  | 98   | 12  | 671 | 183  | 1745 | 793  | 1074 | 73  | 195  | 598  |
| B62_COV  | 25000 | 378653 | 859  | 163  | 218  | 239 | 370 | 196  | 2164 | 729  | 631  | 381 | 141  | 620  |

A : homologous primary / secondary immunization with AZD1222; AB: heterologous primary / secondary immunization with AZD1222/BNT162b2; B: homologous primary / secondary immunization with BNT162b2. \_COV: infection with SARS-CoV-2 instead of mRNA boost.

**Table S2.** Restimulation with Wu-Hu-1 and Omicron peptide pools did not show significantly increased expression of the following markers

5

|                            | without stimulation<br>positive cells /10 <sup>6</sup> live<br>PBMC [median] | Wu-Hu-1 stimulated<br>positive cells /10 <sup>6</sup> live<br>PBMC [median] | Omicron stimulated<br>positive cells /10 <sup>6</sup> live<br>PBMC [median] | Comparison w/o<br>stimulation vs.<br>Wu-Hu-1<br>[P]* | Comparison w/o<br>stimulation vs. Omicron<br>[P]* |
|----------------------------|------------------------------------------------------------------------------|-----------------------------------------------------------------------------|-----------------------------------------------------------------------------|------------------------------------------------------|---------------------------------------------------|
| CD4+ T-Cells<br>expressing |                                                                              |                                                                             |                                                                             |                                                      |                                                   |
| CD25                       | 18,774                                                                       | 22,287                                                                      | 21,386                                                                      | 0.327                                                | 0.779                                             |
| CD137                      | 462                                                                          | 363                                                                         | 415                                                                         | 0.889                                                | 0.889                                             |
| Fas-L                      | 2,381                                                                        | 2,691                                                                       | 2,601                                                                       | 0.889                                                | 0.263                                             |
| TNF $\alpha$               | 109                                                                          | 139                                                                         | 95                                                                          | 0.263                                                | 0.575                                             |
| IL-4                       | 188                                                                          | 291                                                                         | 262                                                                         | 0.674                                                | 0.779                                             |
| IL-10                      | 518                                                                          | 1,146                                                                       | 1,212                                                                       | 0.161                                                | 0.327                                             |
| GrzB                       | 27,399                                                                       | 25,341                                                                      | 24,223                                                                      | 0.779                                                | 0.327                                             |
| CD8+ T-Cells<br>expressing |                                                                              |                                                                             |                                                                             |                                                      |                                                   |
| CD25                       | 92,122                                                                       | 107,849                                                                     | 96,503                                                                      | 0.208                                                | 0.401                                             |
| CD137                      | 949                                                                          | 920                                                                         | 970                                                                         | 0.779                                                | 0.889                                             |
| Fas-L                      | 1,175                                                                        | 950                                                                         | 842                                                                         | 0.575                                                | 0.779                                             |
| IL-2                       | 624                                                                          | 681                                                                         | 646                                                                         | 0.263                                                | 0.263                                             |
| IFN $\gamma$               | 1,198                                                                        | 950                                                                         | 785                                                                         | 0.779                                                | 0.575                                             |
| TNF $\alpha$               | 499                                                                          | 598                                                                         | 320                                                                         | 0.779                                                | 0.208                                             |
| IL-4                       | 197                                                                          | 129                                                                         | 128                                                                         | 0.327                                                | 0.128                                             |
| IL-10                      | 604                                                                          | 573                                                                         | 597                                                                         | 0.208                                                | 0.327                                             |
| GrzB                       | 110,578                                                                      | 113,903                                                                     | 110,247                                                                     | 1                                                    | 0.484                                             |

\* Wilcoxon matched pairs signed rank test

6
